# Supplementary material
Source: MDPI journal article supplement (https://www.mdpi.com/1424-2818/15/2/191)
Supplement: s1 [file s1]

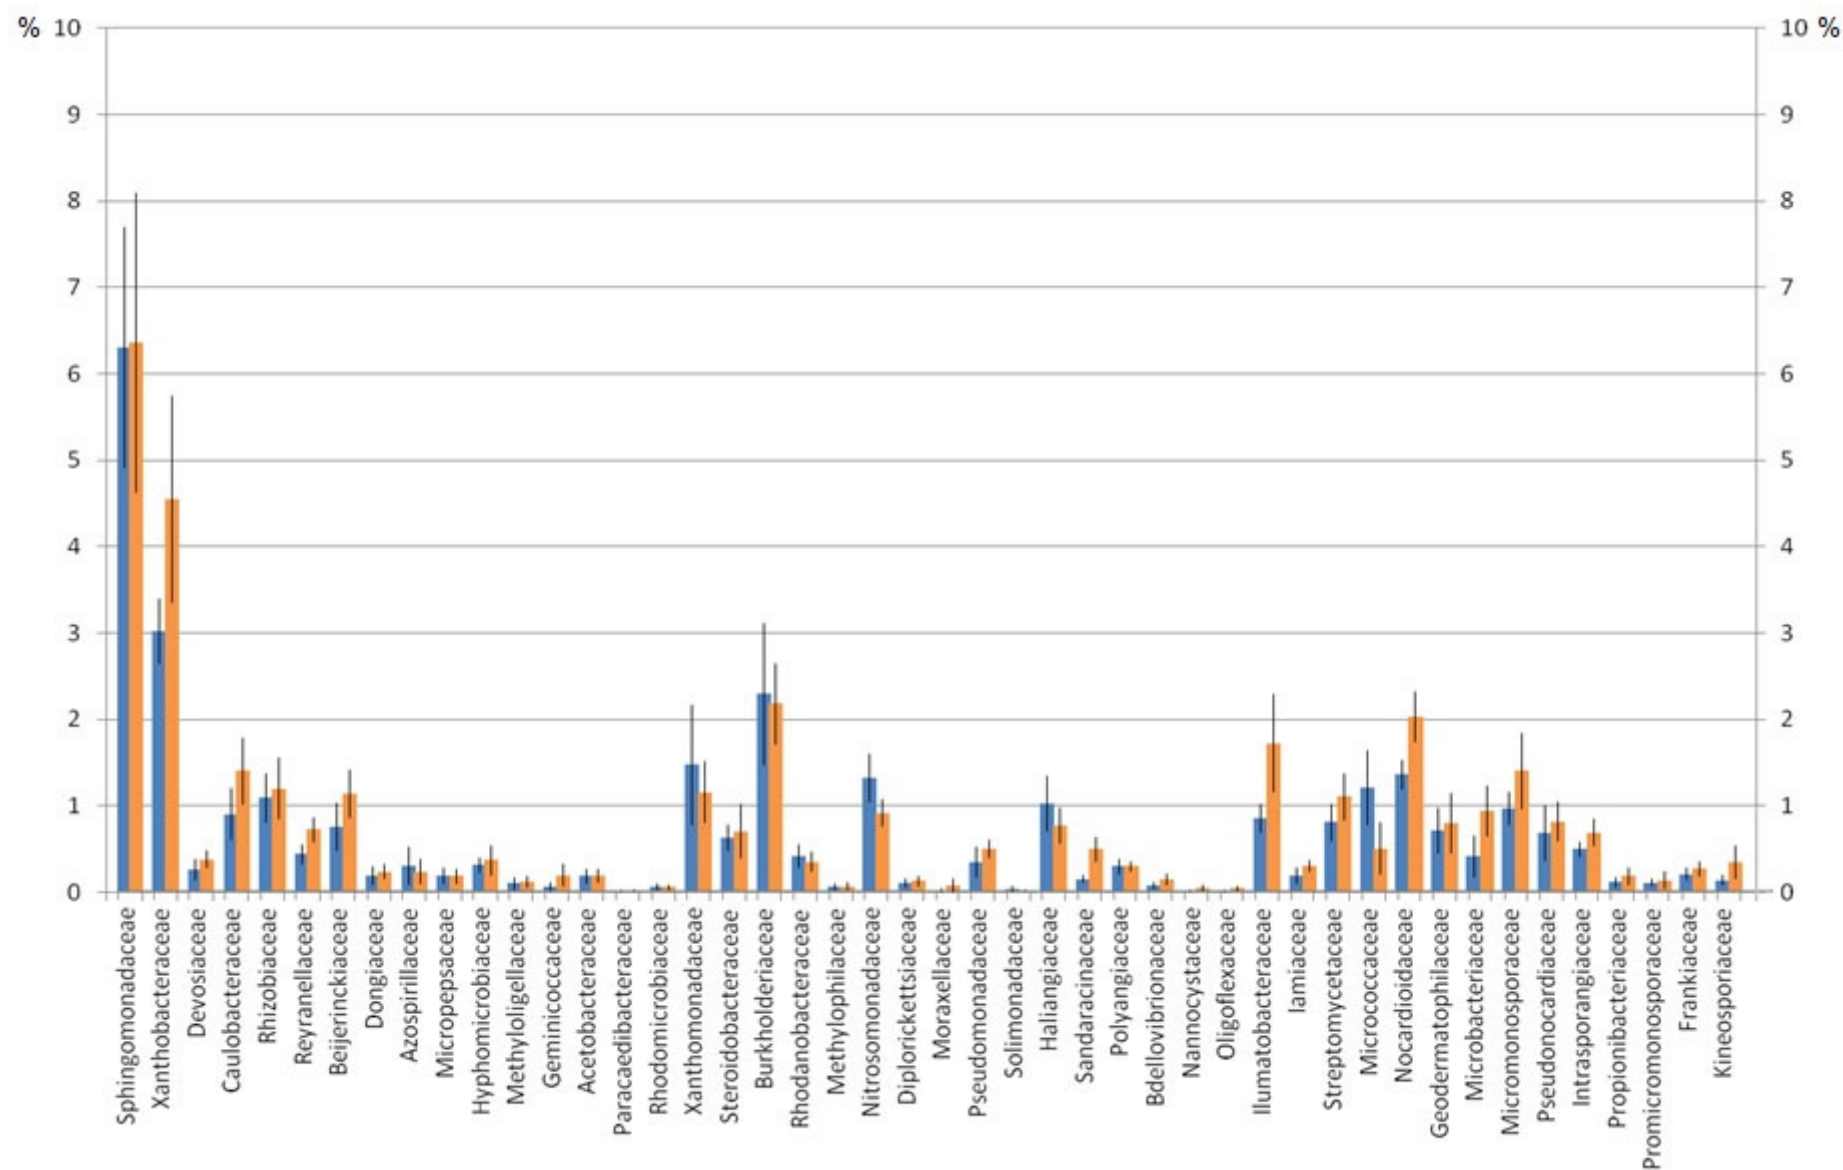

Figure S1 (Beginning) Shares of bacterial families in microbiota of chernozem. Blue bars mean arable sites, orange not arable. 95% confidence intervals were calculated for n=10.

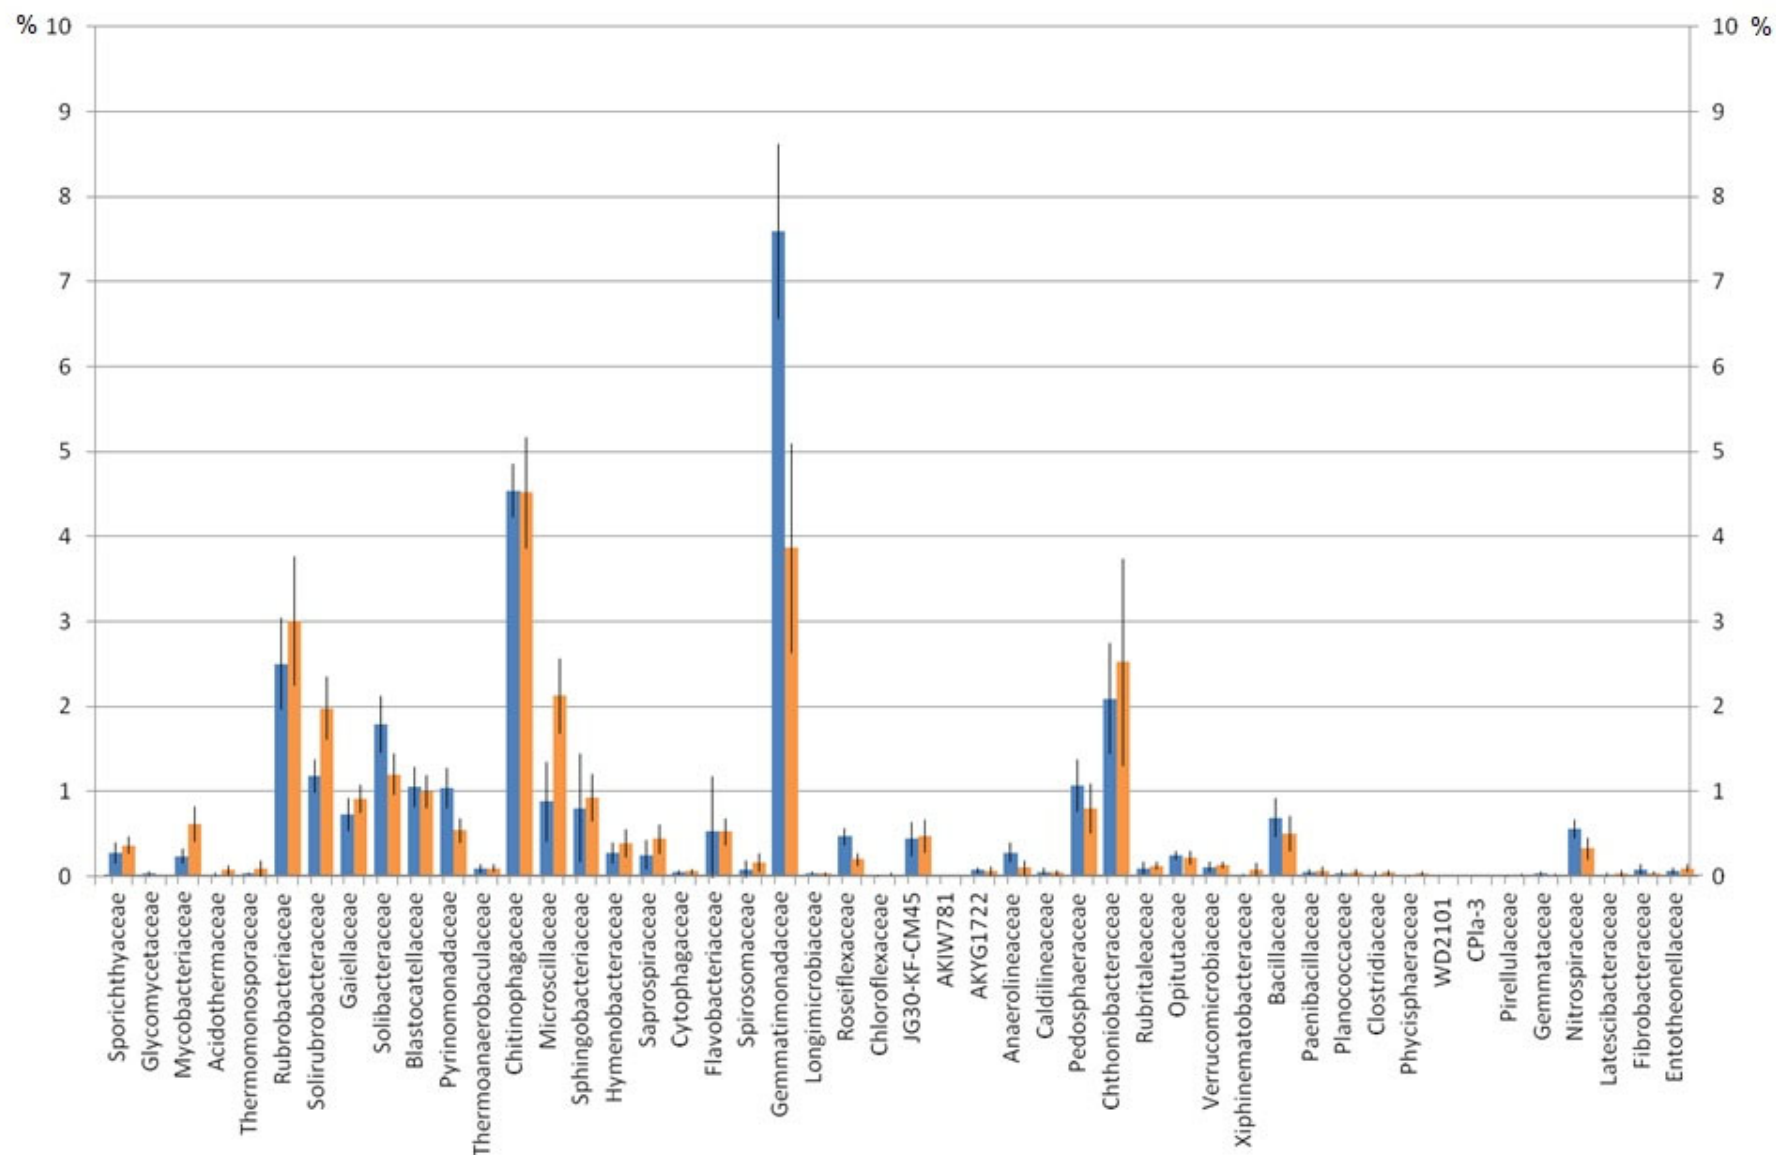

Figure S1 (Ending) Shares of bacterial families in microbiota of chernozem. Blue bars mean arable sites, orange not arable. 95% confidence intervals were calculated for n=10.

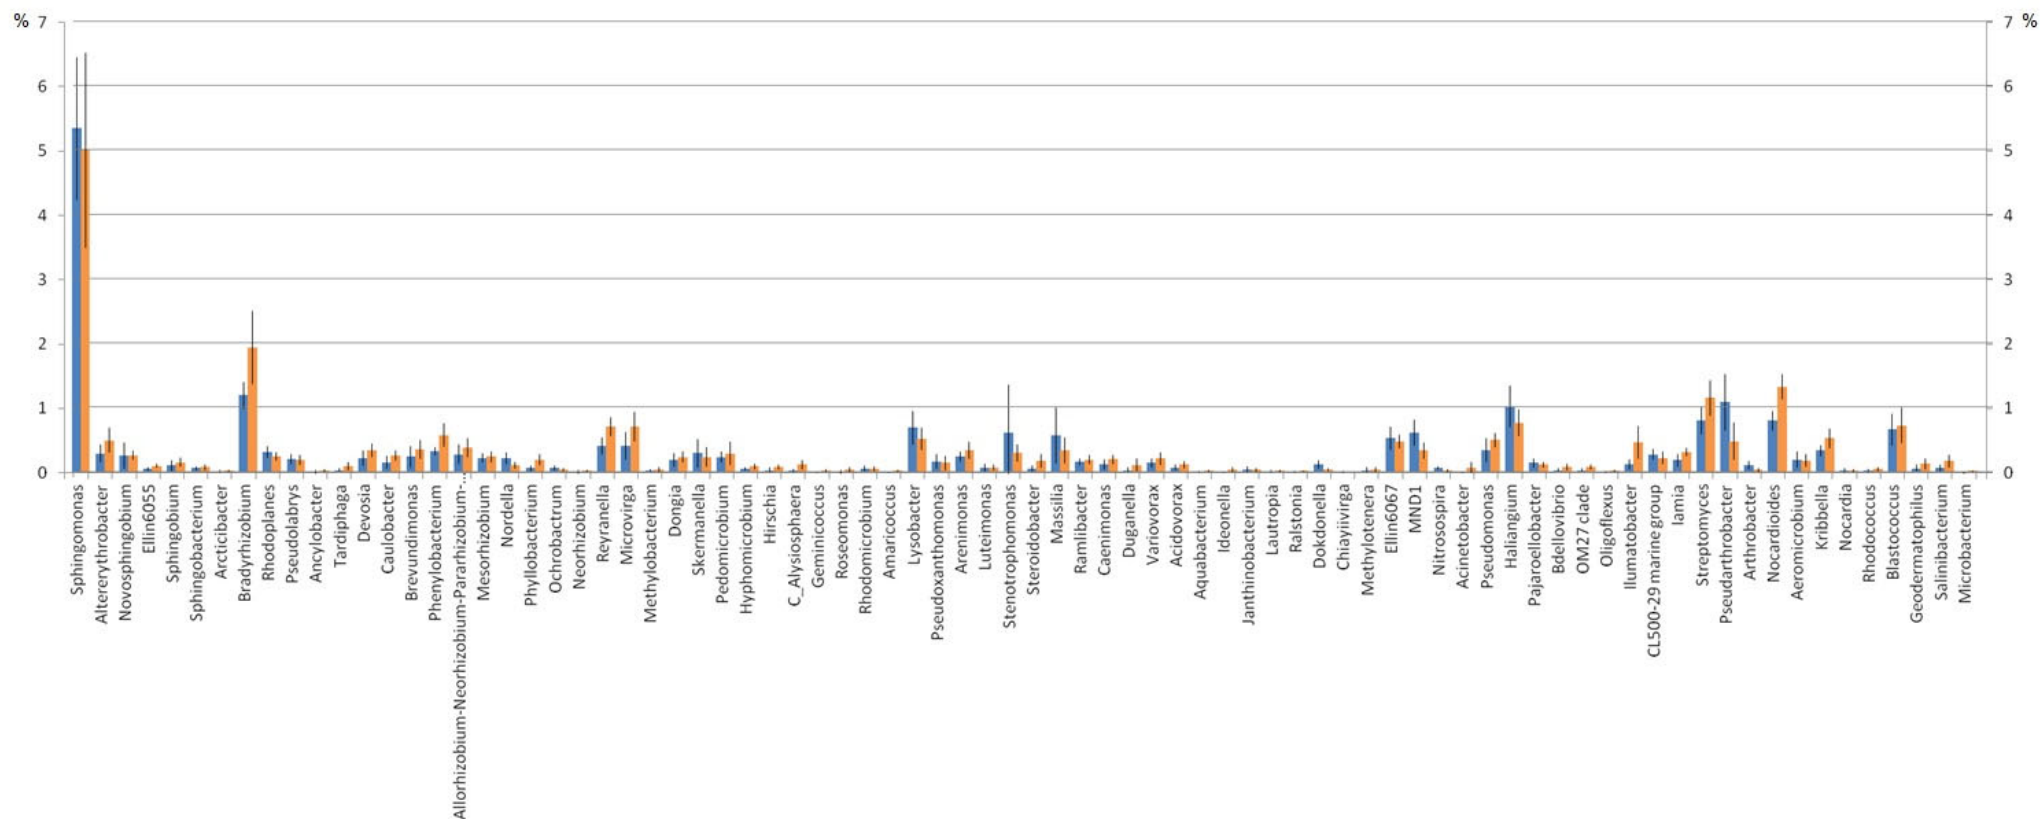

Figure S2 (Beginning) Shares of bacterial genera in microbiota of chernozem. Blue bars mean arable sites, orange not arable. 95% confidence intervals were calculated for n=10.

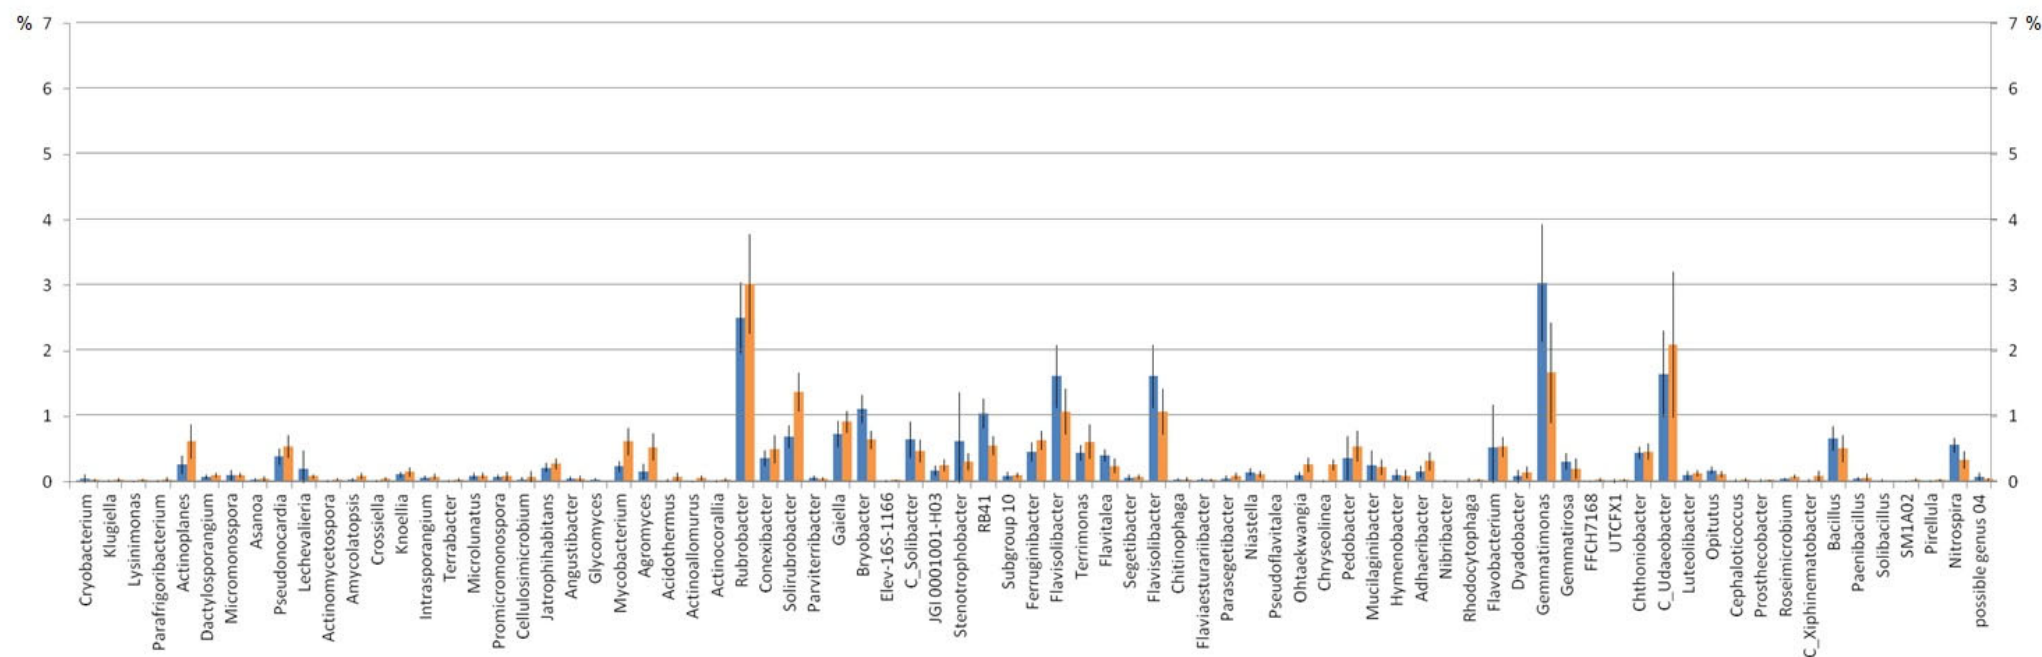

Figure S2 (Ending) Shares of bacterial genera in microbiota of chernozem. Blue bars mean arable sites, orange not arable. 95% confidence intervals were calculated for n=10.
